# Supplementary material
Source: Springer Nature journal article supplement (https://www.springermedizin.de/resource/supplementary/12981_2013_330_MOESM4_ESM.pdf/9603554)

**G1105V**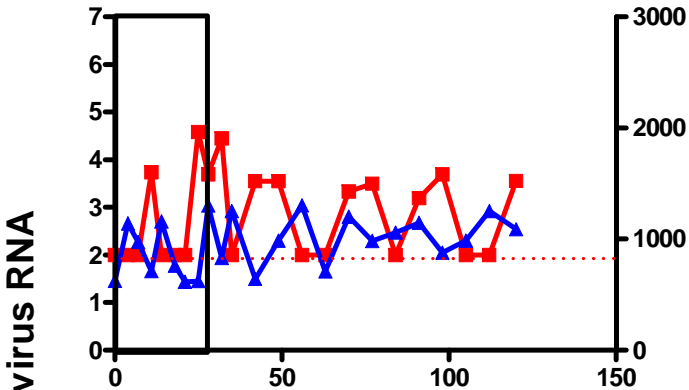**G1106V**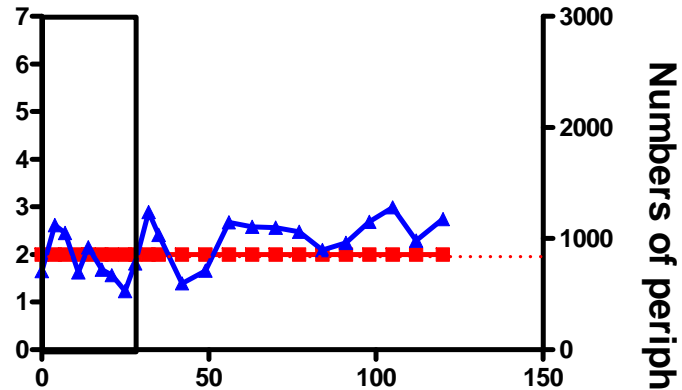**G1115V**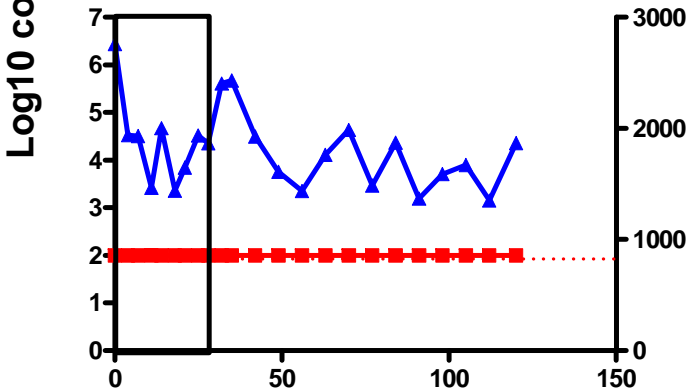**G1116V**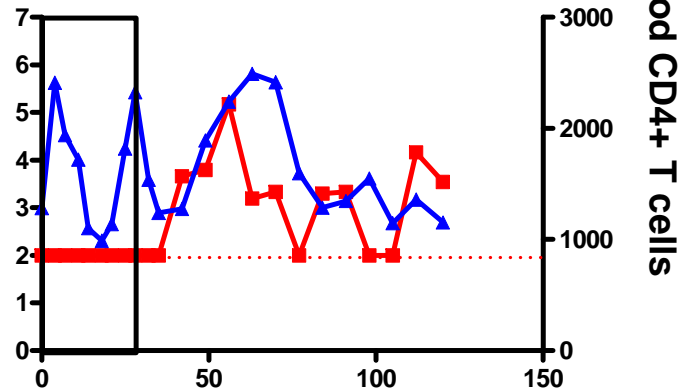

Time post RT-SHIV inoculation (day)

Supplement: MOESM4 [file 9603554]
